# Supplementary material for: Penultimate deglacial warming across the Mediterranean Sea revealed by clumped isotopes in foraminifera
Source: PubMed Central journal article supplement (PMC5707372; doi:10.1038/s41598-017-16528-6), 2017-11-29
Supplement: 41598_2017_16528_MOESM1_ESM.pdf [file 41598_2017_16528_MOESM1_ESM.pdf]

1 **Penultimate deglacial warming across the Mediterranean Sea revealed by**  
2 **clumped isotope in foraminifera**

3

4

5 L. Rodríguez-Sanz<sup>1\*</sup>, S. M. Bernasconi<sup>2</sup>, G. Marino<sup>1</sup>, D. Heslop<sup>1</sup>, I. A. Müller<sup>2</sup>, A. Fernandez<sup>2</sup>,  
6 K. M. Grant<sup>1</sup> & E.J. Rohling<sup>1,3</sup>

7

8 <sup>1</sup>Research School of Earth Sciences, The Australian National University, Canberra, Australian  
9 Capital Territory 2601, Australia.

10 <sup>2</sup>Geological Institute, ETH Zurich, Sonneggstr. 5, 8092 Zurich, Switzerland.

11 <sup>3</sup>Ocean and Earth Science, University of Southampton, National Oceanography Centre,  
12 Southampton S014 3ZH, UK

13 \*Correspondence to [laura.rodriguez@anu.edu.au](mailto:laura.rodriguez@anu.edu.au)

14

15

16

17

18

19 **SUPPLEMENTARY INFORMATION**

## 20 **Supplementary information**

21 Supplementary Figures 1-4 are called in the main text and methods to further clarify and support  
22 our conclusions. Supplementary Figures 5-11 are discussed in the text below.

23

## 24 **Validation of the non-traditional $\Delta_{47}$ data-analysis approach**

25 *Data smoothing.* The  $\Delta_{47}$ -based time series is a mixed signal between the ambient seawater  
26 temperature recorded in the foraminiferal calcite, instrument shot-noise limit, measurement  
27 error, sample preparation artefacts, and other unidentified sources of uncertainty<sup>1</sup>. In order to  
28 reduce the high variability that these inflict on the  $\Delta_{47}$ -data and highlight the main trends, we  
29 apply a Moving Gaussian Window (MGW) filter. We use this smoothing method because it  
30 allocates weights for averaging the  $\Delta_{47}$ -replicates based on the size of the Gaussian window.  
31 This allows one of the key advancements of our data processing approach, i.e., it does not rely  
32 on any *a-priori* knowledge to obtain the final  $\Delta_{47}$ -temperature records, as opposed to the  
33 traditional binning method. That is, for the traditional  $\Delta_{47}$ -small method it is necessary to define  
34 the boundaries for averaging  $\Delta_{47}$ - $\delta^{18}\text{O}_C$  replicates (binning) from neighbour samples.  
35 Unfortunately, that requires *a-priori* information that is not always available. Although the  
36 simultaneously generated and higher-temporal-resolution  $\delta^{18}\text{O}_C$  record can be used to define the  
37 binning boundaries, this relies on the assumption that temperature and  $\delta^{18}\text{O}_C$  co-vary, which is  
38 not always the case. In the wMed, for instance, temperature and  $\delta^{18}\text{O}_C$  records across HS11 are  
39 markedly asynchronous<sup>2,3</sup> (Fig. 4b-c). The approach we propose in this study only requires  
40 defining the size of the MGW, which here is referred to in terms of the 99.7 % coverage ( $\pm 3\sigma$ )  
41 of a Gaussian distribution in kyr. In general, the larger the size of the window, the smaller the  
42 estimated error of the reconstructed parameter, and the smoother the record. In our case we use a  
43  $\sim 5$  kyr window ( $\pm 1\sigma = 0.8$  kyr) because it provides a reasonable compromise between associated  
44 uncertainties and the length of the climate events we are investigating. Additionally, the

45 frequency response of the 5 kyr MGW filter applied to an evenly spaced white noise signal that  
46 spans the same time interval of our data (Supplementary Fig. 5) shows that it satisfies the goal of  
47 reducing the high frequencies in the record. That is, the 5 kyr MGW should minimize the noise  
48 and highlight the main trend of the  $\Delta_{47}$ -data.

49  
50 *Outlier test.* The outlier test is based on the box-plot approach, which is an intuitive and broadly  
51 recommended method for data analysis, e.g., in medical research<sup>4,5</sup>. It has the advantage of  
52 detecting outliers regardless of the distribution of the sample and for this reason we implemented  
53 it in the approach. The box-plot uses the 25<sup>th</sup> (Q1), 50<sup>th</sup> (Q2), and 75<sup>th</sup> (Q3) percentiles of the  
54 data to characterize the sample (see ref. <sup>4</sup> for a detailed explanation). Data points ( $\Delta_{47}$ -replicates)  
55 are considered outliers if they fall outside the  $Q3+W*(Q3-Q1)$  and  $Q1-W*(Q3-Q1)$  range. The  
56 standard approach of Tukey<sup>6</sup> uses  $W = 1.5$ . In the case of Gaussian distributed data, that value  
57 would identify  $\Delta_{47}$ -replicates outside a  $\pm 2.698\sigma$  range (99.3 % coverage) as outliers. We  
58 consider this range too large to detect outliers in our dataset and therefore we also tried a  
59 conservative definition that would consider outliers  $\Delta_{47}$ -replicates falling outside a  $\pm 2\sigma$  (~95.5 %  
60 coverage) range in a normal distribution ( $W = 0.9826$ ). Supplementary Figure 6 shows that the  
61 final ODP975 record using  $W = 1.5$  is not much different from those obtained using  $W = 0.9826$   
62 (main figures). The records only diverge where the density of the  $\Delta_{47}$ -replicates is low at, e.g.  
63 122-115 kyr in LC21. Yet, because (i) we focus our discussion on the interval between 140-122  
64 kyr and (ii) the MGW filter is sensitive to outlying data, we favoured the conservative test, even  
65 if this implies that a few “potentially good”  $\Delta_{47}$ -replicates might be wrongly removed from the  
66 dataset.

67  
68 *Monte Carlo simulations.* We tested the effect of the number of Monte Carlo simulations in the  
69 final ODP975  $\Delta_{47}$ -temperature record. We run 4 different simulation ensembles: 500, 1,000,

70 5,000, and 10,000. We observe that, while there is no difference in the final  $\Delta_{47}$ -temperature  
71 record, there is a slight effect on how smooth the confidence intervals appear. Fewer simulations  
72 result in a slightly less smoothed record (Supplementary Fig. 7). We selected  $N = 5,000$  for our  
73 study because it offers a good compromise between the smoothness of the confidence intervals  
74 and the time that the simulations take.

75  
76 *Details on the non-traditional data-analysis MATLAB script.* First, three files have to be  
77 provided in the *DATA INPUT* section: *data*, *Age\_Model*, and *Sea\_Level*. *Data* contains  
78 individual measurements of  $\Delta_{47}$  (‰, CDES) and  $\delta^{18}\text{O}$  (‰, VPDB) with its associated depth (in  
79 cm). *Age\_Model* has the tie points (i.e., depth (cm), age (ka BP),  $\pm 1\sigma$  error age (kyr) for the age  
80 model. *Sea\_Level* has the SL reconstruction<sup>7</sup> that will be used to correct for the ice volume  
81 component of the  $\delta^{18}\text{O}$  record ( $\delta^{18}\text{O}_{\text{SW-IVC}}$ ) using specific wMed and eMed  $\delta^{18}\text{O}_{\text{SW-SL}}$   
82 relationships<sup>3</sup>. The MATLAB script calculates the  $\delta^{18}\text{O}_{\text{SW-IVC}}$  for future applications. For our  
83 discussion, there is no appreciable difference whether we use  $\delta^{18}\text{O}_{\text{SW}}$  or  $\delta^{18}\text{O}_{\text{SW-IVC}}$ . Therefore,  
84 we used  $\delta^{18}\text{O}_{\text{SW}}$  for simplicity. *DATA INPUT* section is followed by the *PARAMETERS* section  
85 where the number of Monte Carlo simulations, the size of the MGW, steps increments, and the  
86 coefficients for the equations that best fit the dataset have to be specified. Calculation steps are  
87 divided into three parts (see also Supplementary Fig. 8).

88 **(i)  $\Delta_{47}$ -replicates outlier test and Age model:** Using the information in *Data* the outlier test  
89 is computed where more than 4 replicates ( $\Delta_{47}$ -replicates $>4$ ) in the exact same sample  
90 were possible. The ages of the  $\Delta_{47}$ -replicates deemed to not be outliers are then calculated  
91 using the tie points in *Age\_Model*. Based on this, the MATLAB script generates a *dataset*  
92 containing the depth (cm),  $\delta^{18}\text{O}$  (‰, VPDB),  $\delta^{18}\text{O} \pm 1\sigma$  std (0.08 ‰),  $\Delta_{47}$  (‰),  $\Delta_{47} \pm 1\sigma$   
93 std (0.03 ‰), age (kyr), and  $\pm 1\sigma$  error age (kyr), which is used afterwards for the Monte  
94 Carlo realizations.

95 (ii) **Monte Carlo simulations:** First, 5,000 realizations of Age based on its  $\pm 1\sigma$  chronological  
96 uncertainties are performed using a random walk Monte Carlo routine that employs a  
97 Metropolis–Hastings approach to reject steps in the random walk that will result in age  
98 reversals. Then, 5,000 realizations of the dependent variable (e.g.,  $\Delta_{47}$ ,  $\delta^{18}\text{O}$ , and SL) are  
99 performed by generating normally distributed values of each data point based on their  
100  $\pm 1\sigma$  uncertainties. For each realization, the following steps are carried out: (a) the  $\Delta_{47}$ -  
101 data are converted into temperature using equation 3. (b) This temperature value is used  
102 to correct the temperature component of the  $\delta^{18}\text{O}$  record and to thus determine  $\delta^{18}\text{O}_{\text{SW}}$ .  
103 The latter is done by using realizations of the Temperature- $\delta^{18}\text{O}_{\text{c}}$  relationship based on its  
104  $\pm 1\sigma$  uncertainty (specified in *PARAMETERS*). (c) The SL component of the derived  
105  $\delta^{18}\text{O}_{\text{SW}}$  is corrected for using realizations of the  $\delta^{18}\text{O}_{\text{SW}}$ -SL relationship<sup>3</sup> for the wMed  
106 (ODP975) or eMed (LC21, ODP967) (specified in *PARAMETERS*). (d) A 5 kyr MGW  
107 (size specified in *PARAMETERS*), stepping in increments of 100 years, is applied to each  
108 of the 5,000 times simulated datasets, i.e.  $\Delta_{47}$ ,  $\Delta_{47}$ -temperature,  $\delta^{18}\text{O}$ ,  $\delta^{18}\text{O}_{\text{SW}}$ , and  
109  $\delta^{18}\text{O}_{\text{SW-ivc}}$ .

110 (iii) **Final records and probability intervals:** The 2.5<sup>th</sup>, 16<sup>th</sup>, 50<sup>th</sup>, 84<sup>th</sup>, and 97.5<sup>th</sup> percentiles  
111 of all the 5,000 MGW filtered Monte Carlo realizations of the  $\Delta_{47}$ ,  $\Delta_{47}$ -temperature,  $\delta^{18}\text{O}$ ,  
112  $\delta^{18}\text{O}_{\text{SW}}$ , and  $\delta^{18}\text{O}_{\text{SW-IVC}}$  datasets are calculated.

113

114 *Efficiency of the approach in removing noise:* The residuals of a model that adequately  
115 represents the data are (a) normally distributed, (b) independent (i.e., are not autocorrelated), and  
116 (c) are homoscedastic (i.e., have constant variance)<sup>8</sup>. We checked the efficiency of the non-  
117 traditional  $\Delta_{47}$  data-analysis approach by analysing the residuals between the measured  $\Delta_{47}$ -

118 replicates and the 50<sup>th</sup> percentile of the  $\Delta_{47}$  MGW filtered Monte Carlo realizations  
119 (Supplementary Fig. 9-11).

120 (a) We checked that the residuals were normally distributed by applying the so-called  
121 ‘Lilliefors Test’<sup>9</sup> at the 0.05 significance level. The histogram and Quantile-Quantile plot of the  
122 residuals are also shown, along with the residuals (Supplementary Fig. 9-11a-c), to visually  
123 corroborate the results of the Lilliefors test.

124 (b) We tested that the residuals were not auto-correlated by estimating their persistence time  
125 ( $\tau$ ) using a first-order autoregressive model (AR(1), ref. <sup>10</sup>). We expect  $\tau$  to be small when the  
126 model residuals are independent. We first tried to estimate  $\tau$  using the TAUEST software<sup>10</sup>. It  
127 returned an error because our records are not only unevenly spaced but also some ages are  
128 replicated. Hence, we extracted equations 2-3 from TAUEST (ref. <sup>10</sup>) to estimate if fluctuations  
129 in the residuals have a memory (if any) considerably smaller than the events of interest,  
130 e.g.,  $\tau < 1000$  yrs. Equation 2 in ref. <sup>10</sup> defines the parameter  $a$  as a function of  $\tau$ ;  $a = \exp(-1/\tau)$ ,  
131 and equation 3 in ref. <sup>10</sup> is the least-squares estimator,  $S(a)$ , which is minimized to estimate  $a$ .  
132 We calculated  $S(a)$  for the  $\Delta_{47}$  residuals 5,000 times using the unique ages (i.e., no replicated  
133 ages), with the option of randomly drawing a  $\Delta_{47}$  residuals value when a sample has  $\Delta_{47}$ -  
134 replicates  $> 1$ . We compare the results to that of a system that has no memory in it. For this, we  
135 randomised (i.e., induced  $\tau = 0$  yrs) each of the 5,000  $\Delta_{47}$  residual realizations and calculated  
136  $S(a)$ . Supplementary Figures 9-11d shows the 97.5<sup>th</sup>, 50<sup>th</sup>, 2.5<sup>th</sup> percentiles for the 5,000  
137 instances that  $S(a)$  was calculated before (blue) and after (red) residuals were randomised. For  
138 all the cores the two systems have similar behaviours implying that  $\tau$ , and in turn the  
139 autocorrelation, in the residuals is very small. This is corroborated when looking at the kernel  
140 density estimate of  $\tau$  (Supplementary Fig. 9-11e), a rough estimate of the memory in the  
141 residuals, which is always  $< 1000$  years.

142 (c) The heteroscedasticity was evaluated by checking that the squared residuals<sup>11</sup> were not  
143 autocorrelated, following the same procedure explained in (b). Supplementary Figs. 9-11f-g  
144 show that, for all three sediment cores, the squared residuals show no autocorrelation.

145

146 **References**

- 147  
 148 1 Zaarur, S., Affek, H. P. & Brandon, M. T. A revised calibration of the clumped isotope  
 149 thermometer. *Earth and Planetary Science Letters* **382**, 47-57,  
 150 DOI:10.1016/j.epsl.2013.07.026 (2013).  
 151 2 Martrat, B., Jimenez-Amat, P., Zahn, R. & Grimalt, J. O. Similarities and dissimilarities  
 152 between the last two deglaciations and interglaciations in the North Atlantic region.  
 153 *Quaternary Science Reviews* **99**, 122-134, DOI:10.1016/j.quascirev.2014.06.016 (2014).  
 154 3 Marino, G. *et al.* Bipolar seesaw control on last interglacial sea level. *Nature* **522**, 197-  
 155 201, DOI:10.1038/nature14499 (2015).  
 156 4 Krzywinski, M. & Altman, N. Points of Significance: Visualizing samples with box  
 157 plots. *Nat Meth* **11**, 119-120, DOI:10.1038/nmeth.2813 (2014).  
 158 5 Spitzer, M., Wildenhain, J., Rappsilber, J. & Tyers, M. BoxPlotR: a web tool for  
 159 generation of box plots. *Nat Meth* **11**, 121-122, DOI:10.1038/nmeth.2811 (2014).  
 160 6 Tukey, J. (Addison-Wesley, 1977).  
 161 7 Grant, K. M. *et al.* Rapid coupling between ice volume and polar temperature over the  
 162 past 150,000 years. *Nature* **491**, 744-747, DOI:10.1038/nature11593 (2012).  
 163 8 Jarque, C. M. & Bera, A. K. Efficient tests for normality, homoscedasticity and serial  
 164 independence of regression residuals. *Economics Letters* **6**, 255-259, DOI:10.1016/0165-  
 165 1765(80)90024-5 (1980).  
 166 9 Lilliefors, H. W. On the Kolmogorov-Smirnov Test for Normality with Mean and  
 167 Variance Unknown. *Journal of the American Statistical Association* **62**, 399-402,  
 168 DOI:10.2307/2283970 (1967).  
 169 10 Mudelsee, M. TAUEST: a computer program for estimating persistence in unevenly  
 170 spaced weather/climate time series. *Computers & Geosciences* **28**, 69-72 (2002).  
 171 11 Li, W. K. & Mak, T. K. ON THE SQUARED RESIDUAL AUTOCORRELATIONS IN  
 172 NON-LINEAR TIME SERIES WITH CONDITIONAL HETEROSKEDASTICITY.  
 173 *Journal of Time Series Analysis* **15**, 627-636, DOI:10.1111/j.1467-9892.1994.tb00217.x  
 174 (1994).  
 175 12 Grant, K. M. *et al.* The timing of Mediterranean sapropel deposition relative to  
 176 insolation, sea-level and African monsoon changes. *Quaternary Science Reviews* **140**,  
 177 125-141, DOI:10.1016/j.quascirev.2016.03.026 (2016).  
 178 13 Grant, K. M. *et al.* A 3 million year index for North African humidity/aridity and the  
 179 implication of potential pan-African Humid periods. *Quaternary Science Reviews* **171**,  
 180 100-118, DOI:10.1016/j.quascirev.2017.07.005 (2017).  
 181 14 Rohling, E. J., Marino, G. & Grant, K. M. Mediterranean climate and oceanography, and  
 182 the periodic development of anoxic events (sapropels). *Earth-Science Reviews* **143**, 62-  
 183 97, DOI:10.1016/j.earscirev.2015.01.008 (2015).  
 184 15 Rohling, E. J. *et al.* Reconstructing past planktic foraminiferal habitats using stable  
 185 isotope data: a case history for Mediterranean sapropel S5. *Marine Micropaleontology*  
 186 **50**, 89-123, DOI:10.1016/S0377-8398(03)00068-9 (2004).  
 187 16 Berger, A. Long-Term Variations of Daily Insolation and Quaternary Climatic Changes.  
 188 *Journal of the Atmospheric Sciences* **35**, 2362-2367, DOI:10.1175/1520-  
 189 0469(1978)035<2362:ltvodi>2.0.co;2 (1978).  
 190



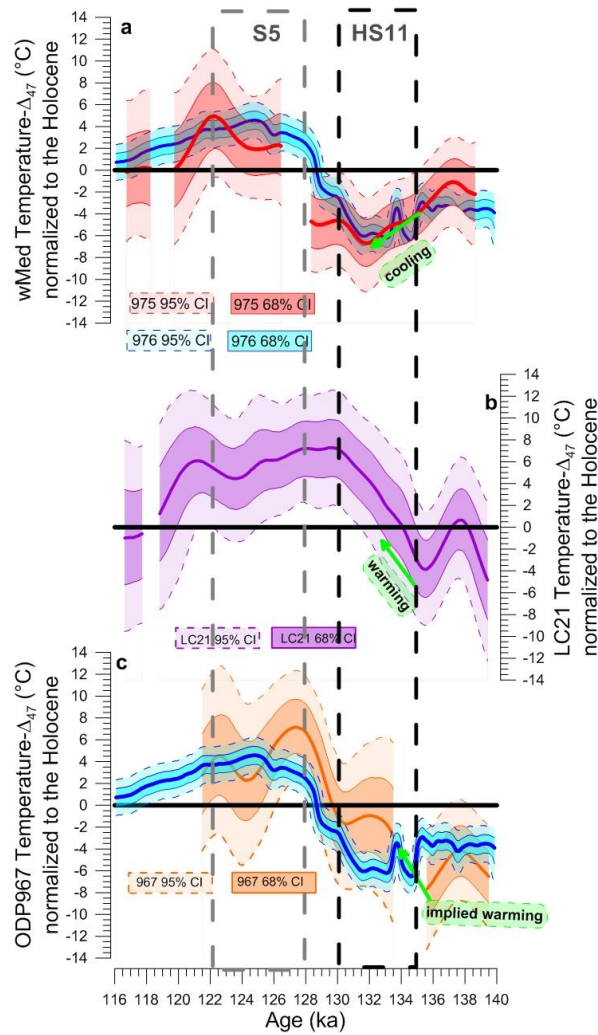

191  
 192  
 193  
 194  
 195  
 196  
 197  
 198  
 199  
 200  
 201  
 202  
 203

**Supplementary Figure 1. TII and last interglacial temperature gradient with respect to late-Holocene in the wMed and eMed (individual records).** Gradients were calculated by subtracting the late-Holocene  $\Delta_{47}$ -temperature average values ( $\sim 17 \pm 2$  °C for wMed and  $\sim 22 \pm 2$  °C for eMed records) from each of the 5,000 simulations of **a**, (in red) ODP975; **b**, LC21; and **c**, ODP967  $\Delta_{47}$ -temperature records, respectively. In **a** and **c** we also show the  $U_{37}^{K'}$ -temperature record from ODP976 normalized (blue) to the late-Holocene temperature value obtained from ref.<sup>2</sup>. Light and dark shadings correspond to the 95 % and 68 % CI of the temperature gradients. Dashed grey and black boxes highlight the last interglacial S5 interval<sup>7</sup> ( $\sim 128.3$ - $121.5$  ka) and HS11 (135-130 ka, ref. 3), respectively. Gaps in the final  $\Delta_{47}$ -records correspond to intervals where the age uncertainties of the  $\Delta_{47}$ -replicates do not overlap.

204

205

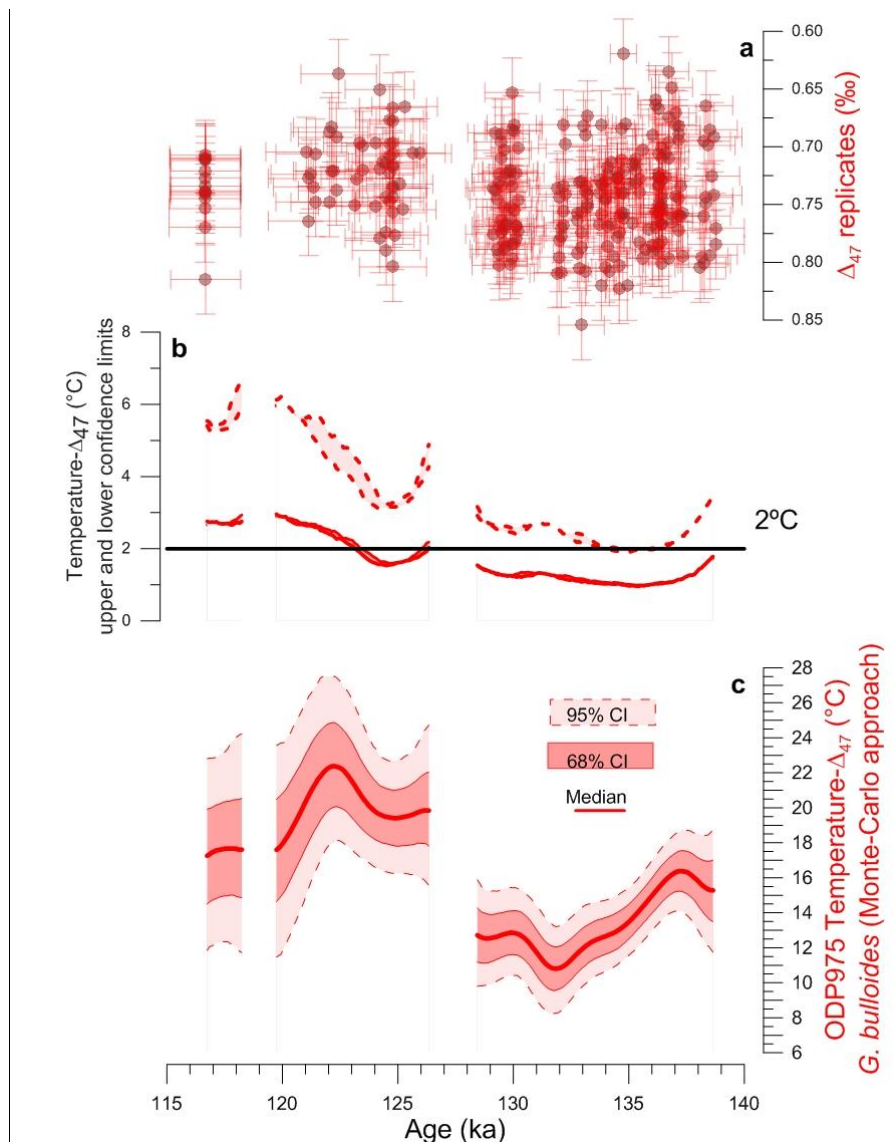

206

207 **Supplementary Figure 2. Temperature error across the ODP975 *G. bulloides* record. a,  $\Delta_{47}$ -**  
208 **replicates. b, Upper and lower limits of the 68 % CI (thick lines) and 95 % CI (dashed lines)**  
209 **subtracted from the median in the  $\Delta_{47}$ -temperature ODP975 record shown in c. Grey boxes**  
210 **highlight the gaps in the  $\Delta_{47}$ -replicates data and the effect in the errors. Notice that our data-**  
211 **processing approach accounts for intervals of low  $\Delta_{47}$ -replicates density that result from low-**  
212 **foraminifera abundances. The confidence intervals become larger (smaller) during periods of**  
213 **low (high)  $\Delta_{47}$ -replicates density. Gaps in the final  $\Delta_{47}$ -record correspond to intervals where the**  
214 **age uncertainties of the  $\Delta_{47}$ -replicates do not overlap.**

215

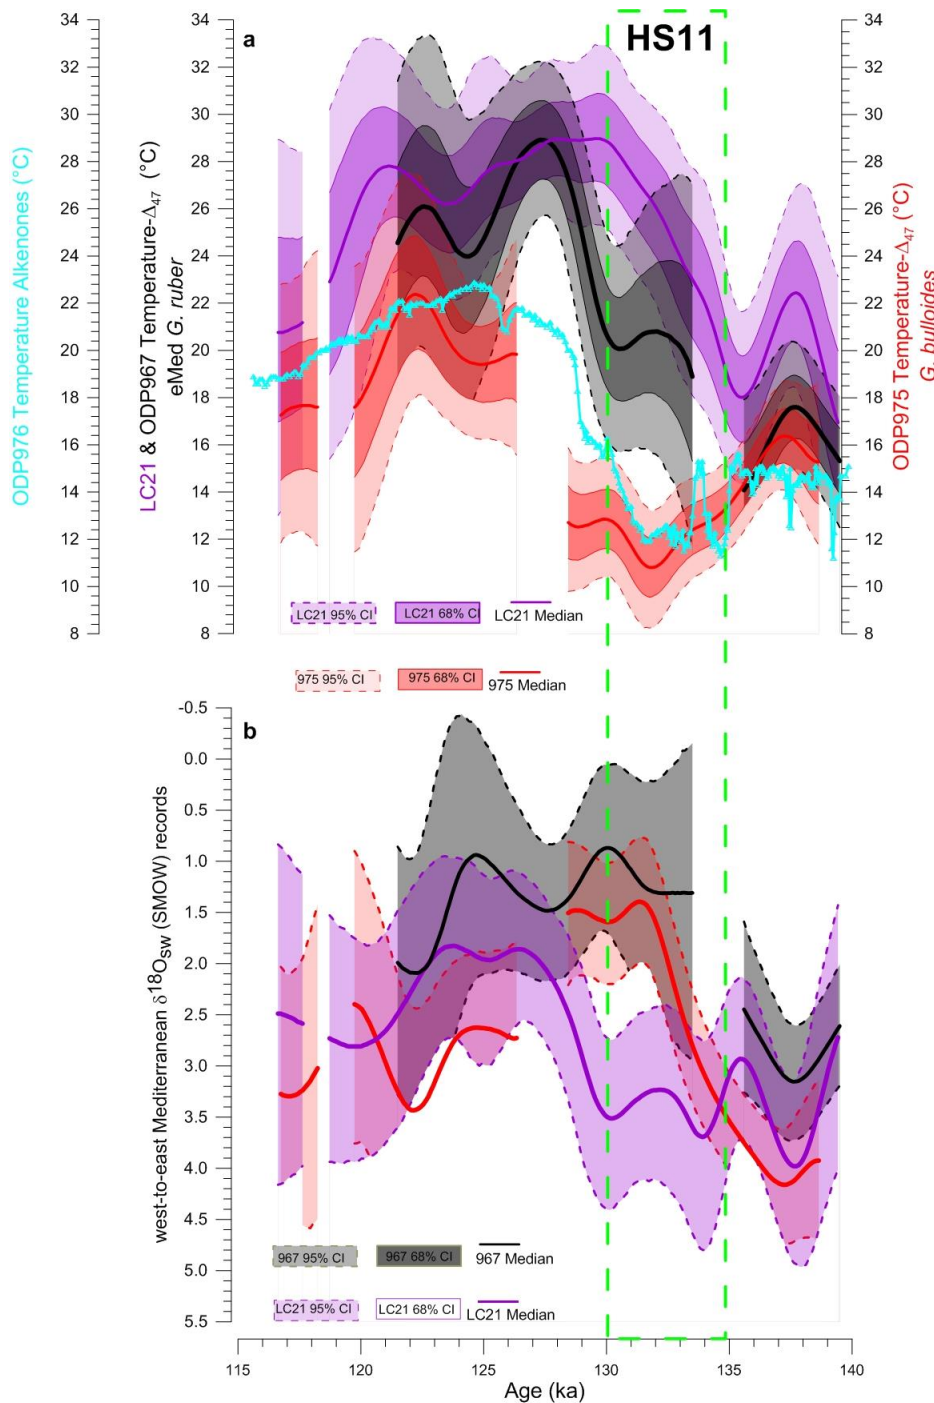

216  
 217 **Supplementary Figure 3. Temperature and  $\delta^{18}O_{sw}$  contrast across the Mediterranean Sea**  
 218 **during HS11.** Thick lines correspond to the median of 5,000 Monte Carlo simulations of the  
 219  $\Delta_{47}$ -replicates and ages within their ( $1\sigma$ ) uncertainties. Light and dark shadings correspond to the  
 220 95 % and 68 % CI of the records. Light green box highlights the HS11 (135-130 ka, ref. <sup>3</sup>). Gaps  
 221 in the final  $\Delta_{47}$ -records correspond to intervals where the age uncertainties of the  $\Delta_{47}$ -replicates  
 222 do not overlap. In panel b we only show the 95 % CI of the  $\delta^{18}O_{sw}$  records.  
 223

224

225

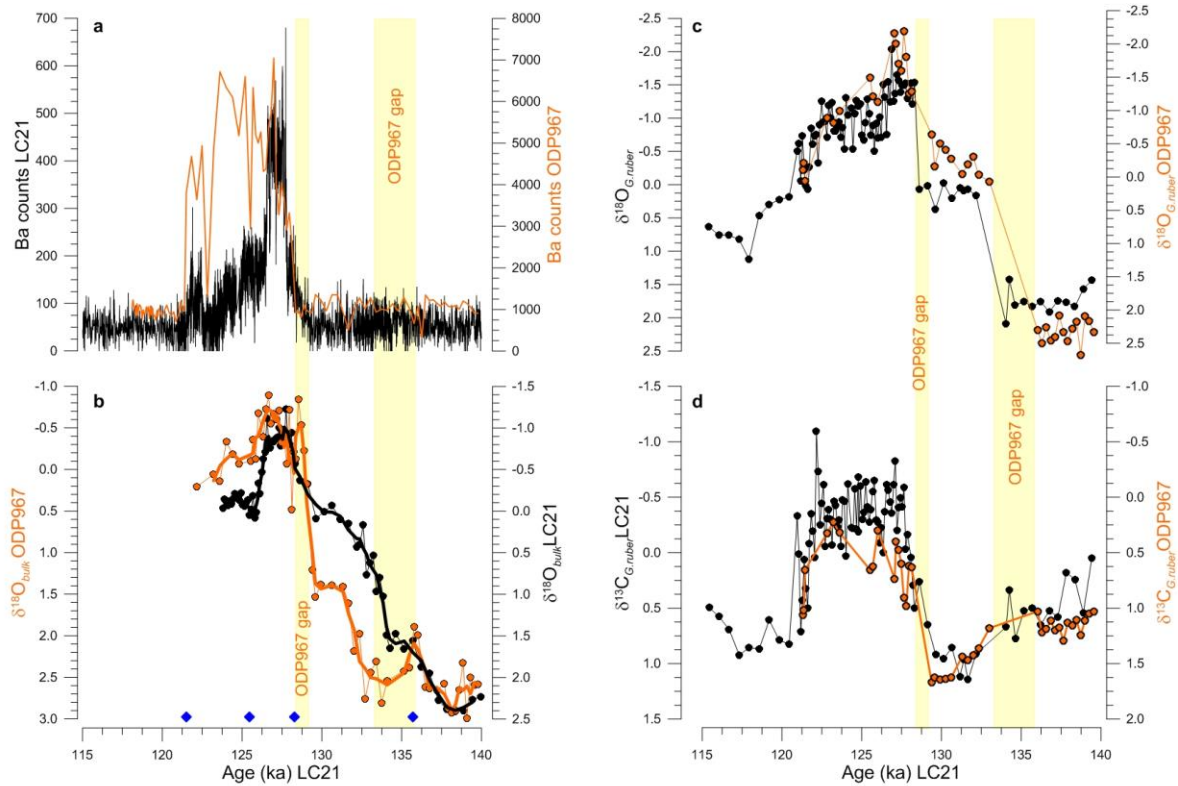

226

227 **Supplementary Figure 4. ODP967 age model. a**, XRF-Ba counts from LC21 (ref. 12) (black)  
228 and ODP967 (ref.<sup>13,14</sup>) (orange). **b**, Bulk  $\delta^{18}\text{O}$  records from LC21 (black) and ODP967 (orange).  
229 Blue diamonds in **b** are the tie points used to tune the ODP967 to LC21 record from (ref. <sup>7</sup>).  
230 Comparison of a high temporal resolution *G. ruber*  $\delta^{18}\text{O}_C$  **c**, and  $\delta^{13}\text{C}_C$  **d**, record from LC21 (ref.  
231 <sup>7</sup>) and ODP967 on the LC21 chronology. Yellow boxes highlight the gaps in ODP967 *G. ruber*  
232  $\delta^{18}\text{O}$  record that complicated the synchronisation across TII.

233

234

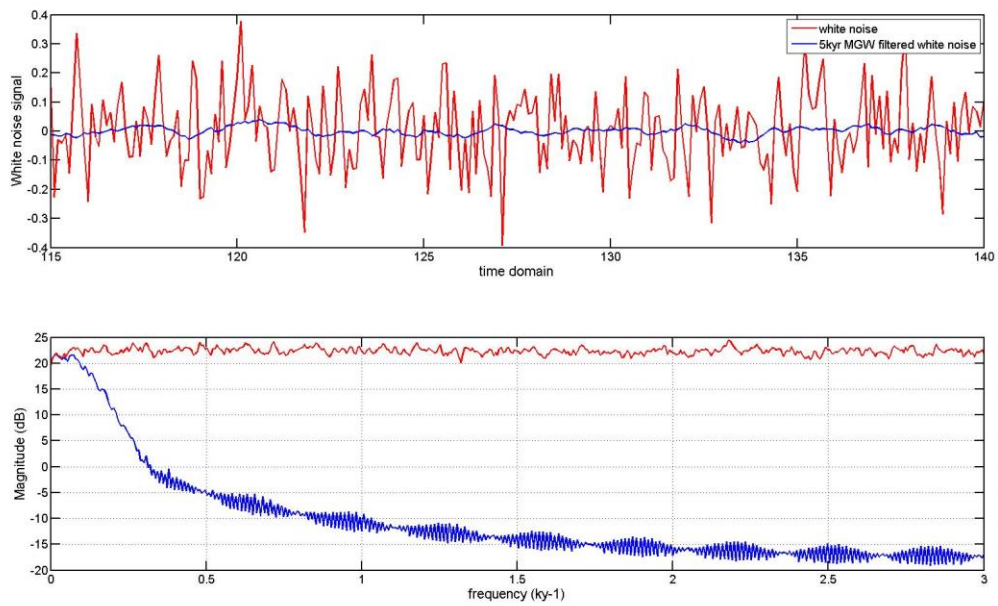

235

236 **Supplementary Figure 5. Frequency response of a 5 kyr Moving Gaussian Window**  
237 **(MGW) filter. a,** random (white) noise time series before (red) and after (blue) applying the 5  
238 kyr MGW filter. **b,** frequencies in the random (white) noise time series before (red) and after  
239 (blue) applying the 5 kyr MGW filter. Observe how the high frequencies are attenuated after  
240 applying the filter.

241

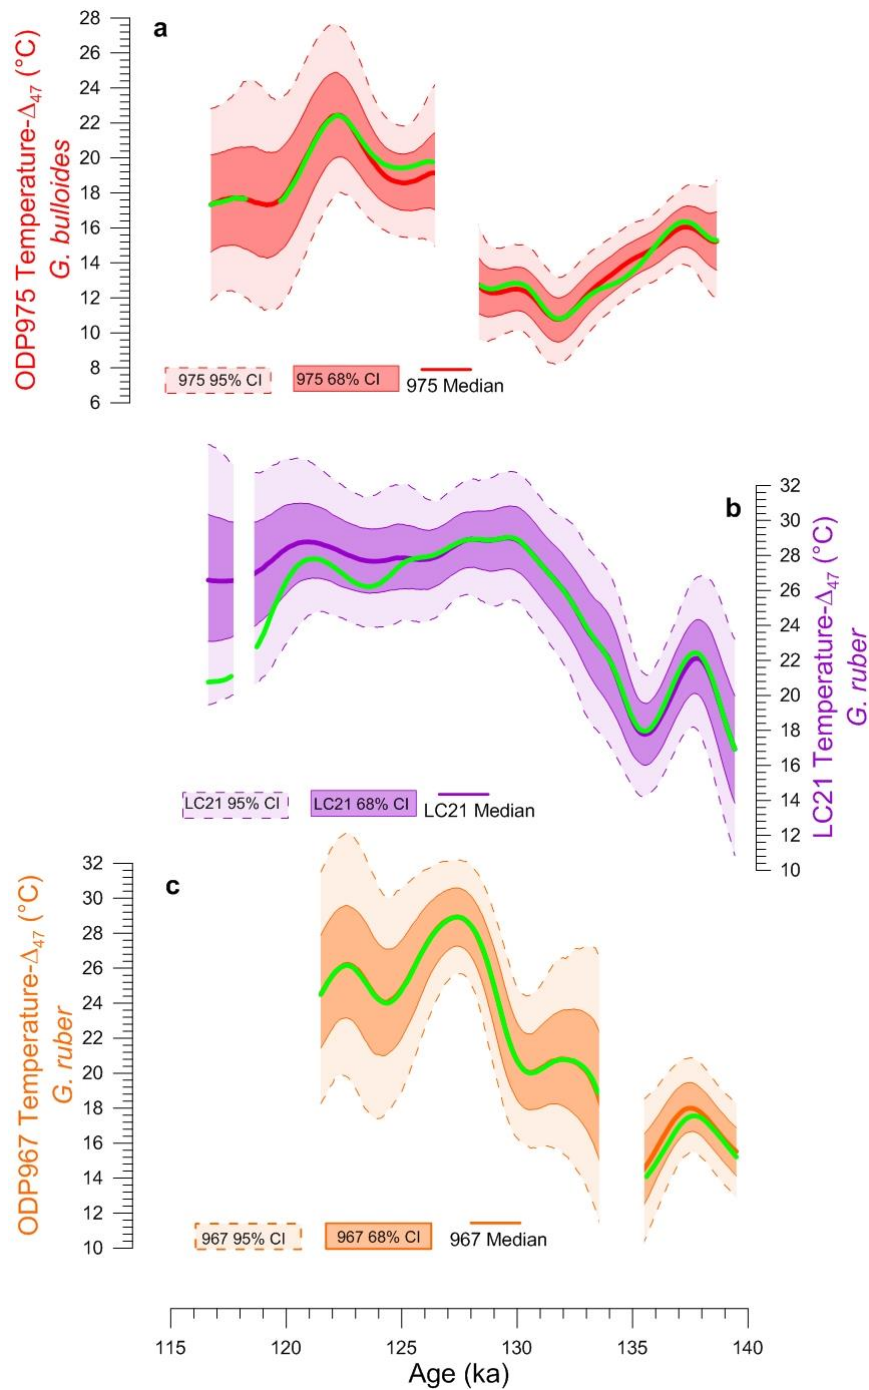

242  
243

244 **Supplementary Figure 6.**  $\Delta_{47}$ -temperature records when outlier test uses  $W = 1.5$ . **a,**  
 245 ODP975. **b,** LC21 and **c,** ODP967. Light and dark shadings correspond to the 95 % and 68 % CI  
 246 of the records. For comparison, we show in green the median of each record using the  
 247 conservative outlier test (same records shown in the main figures). Gaps in the final  $\Delta_{47}$ -records  
 248 correspond to intervals where the age uncertainties of the  $\Delta_{47}$ -replicates do not overlap.

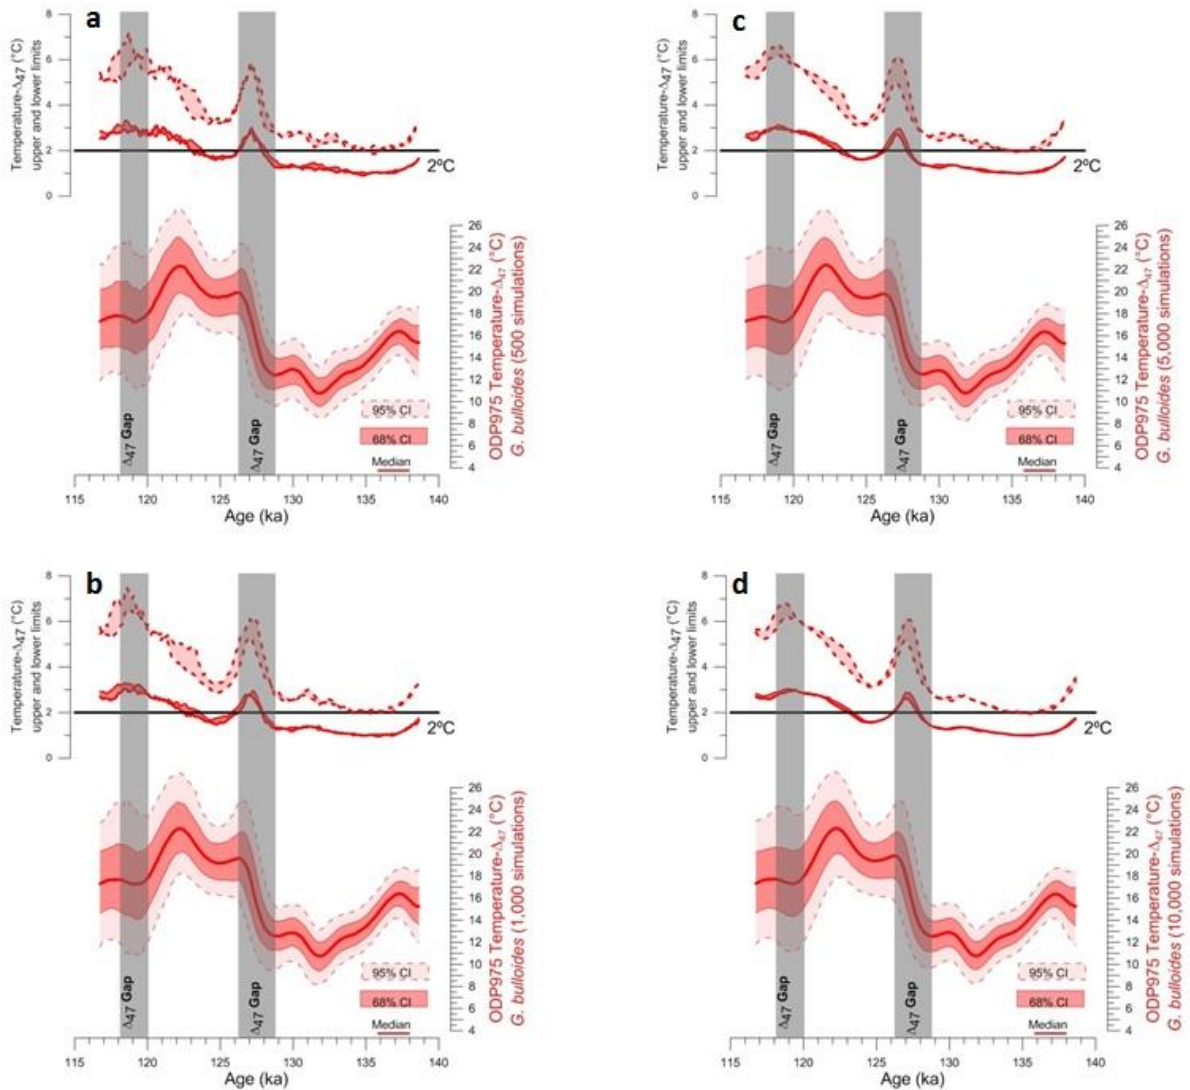

249

250 **Supplementary Figure 7. Effect of the number of Monte Carlo simulations on the final**  
 251 **ODP975  $\Delta_{47}$ -temperature record. a, 500; b, 1,000; c, 5,000; d, 10,000 simulations.** Light and  
 252 dark shadings correspond to the 95 % and 68 % CI of the records. Note that the shape of the  
 253 record is not affected, but the confidence intervals are less smooth as the number of simulations  
 254 decrease. In grey we highlight the gaps in the  $\Delta_{47}$ -records. Observe how the data processing  
 255 approach accounts for these gaps by increasing the confidence intervals. However, for avoiding  
 256 over-interpretation of the data we have removed from the main figures the intervals where the  
 257 age uncertainties of the  $\Delta_{47}$ -replicates do not overlap.

258

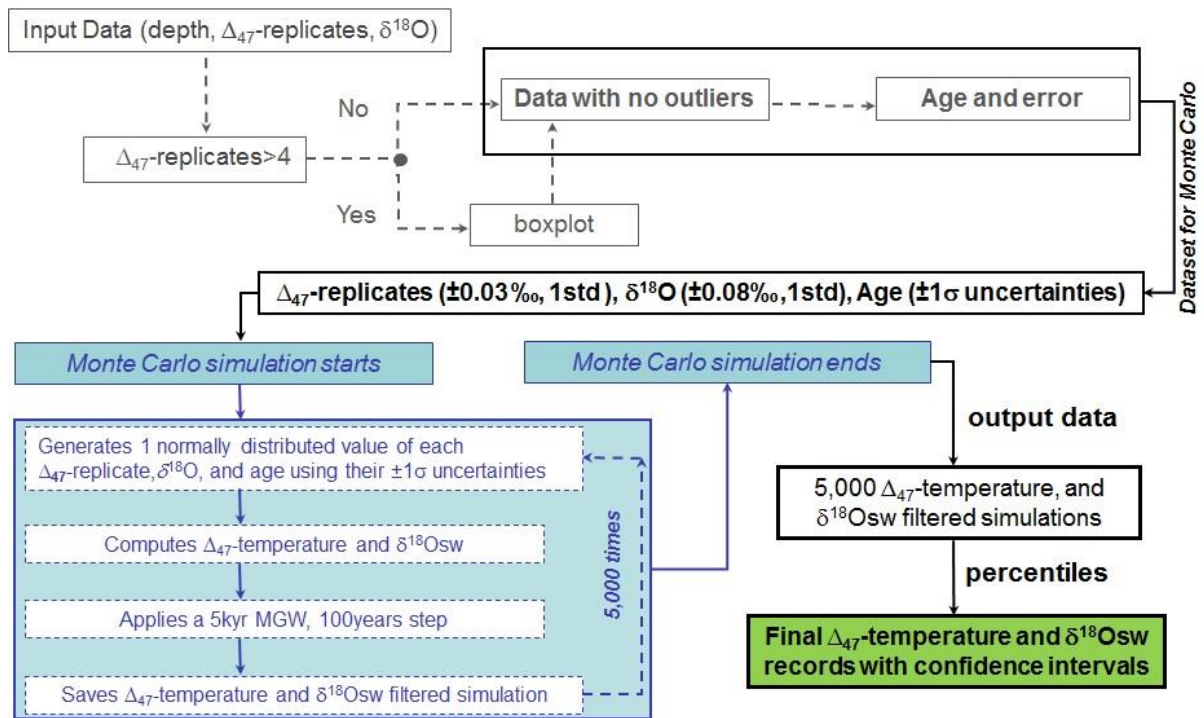

259

260 **Supplementary Figure 8. Flow chart summarizing the steps of the non-traditional data-**  
 261 **analysis approach.**

262

263



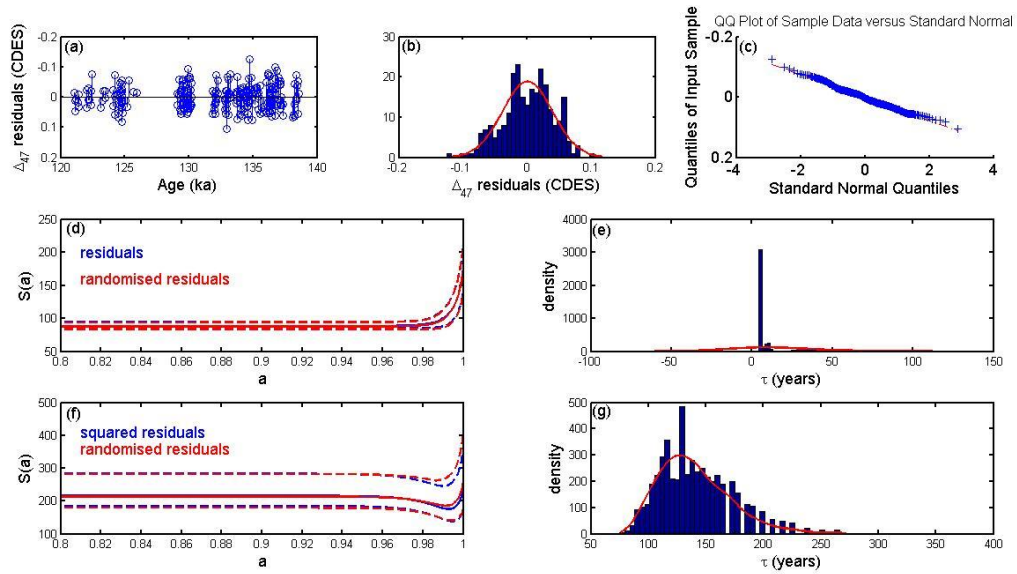

264

265 **Supplementary Figure 9. Residuals analysis for the  $\Delta_{47}$ -record from ODP975.** In the upper

266 panels **(a-c)** we check that residuals are normally distributed, in the middle panels **(d-e)** we

267 check that residuals are not auto-correlated (persistence time  $\tau < 1,000$ year), and in the lower

268 panels **(f-g)** we check residuals for conditional heteroscedasticity. **a**, stem plot of the residuals

269 between the measured  $\Delta_{47}$ -replicates and the 50<sup>th</sup> percentile of the  $\Delta_{47}$  MGW filtered Monte

270 Carlo realizations. **b**, histogram of the residuals. **c**, Quantile-quantile plot of the residuals. **d**,

271 variation of  $S(a)$  - the least-squares estimator that minimizes  $a$  ( $a = \exp(-1/\tau)$ )- when  $a$  varies

272 from 0.8 to 1 and we use the residuals (blue) or the randomised residuals (red). **e**, kernel density

273 estimate of  $\tau$ . **f-g** are like **d-e**, respectively, but using the squared-residuals.

274

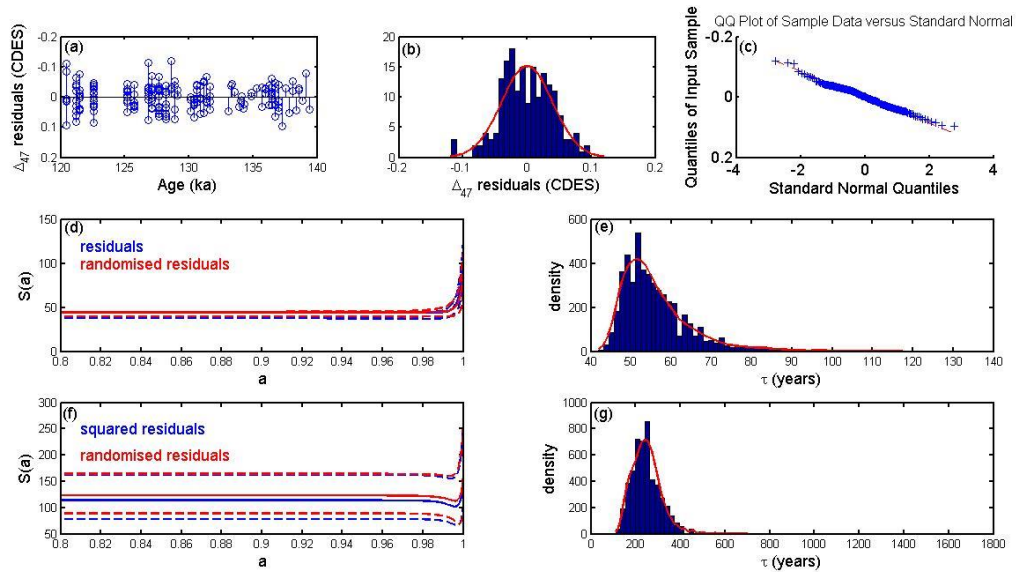

275

276 **Supplementary Figure 10. Residuals analysis for the  $\Delta_{47}$ - record from LC21.** In the upper  
 277 panels **(a-c)** we check that residuals are normally distributed, in the middle panels **(d-e)** we  
 278 check that residuals are not auto-correlated (persistence time  $\tau < 1,000$ year), and in the lower  
 279 panels **(f-g)** we check residuals for conditional heteroscedasticity. **a**, stem plot of the residuals  
 280 between the measured  $\Delta_{47}$ -replicates and the 50<sup>th</sup> percentile of the  $\Delta_{47}$  MGW filtered Monte  
 281 Carlo realizations. **b**, histogram of the residuals. **c**, Quantile-quantile plot of the residuals. **d**,  
 282 variation of  $S(a)$  - the least-squares estimator that minimizes  $a$  ( $a = \exp(-1/\tau)$ )- when  $a$  varies  
 283 from 0.8 to 1 and we use the residuals (blue) or the randomised residuals (red). **e**, kernel density  
 284 estimate of  $\tau$ . **f-g** are like **d-e**, respectively, but using the squared-residuals.

285

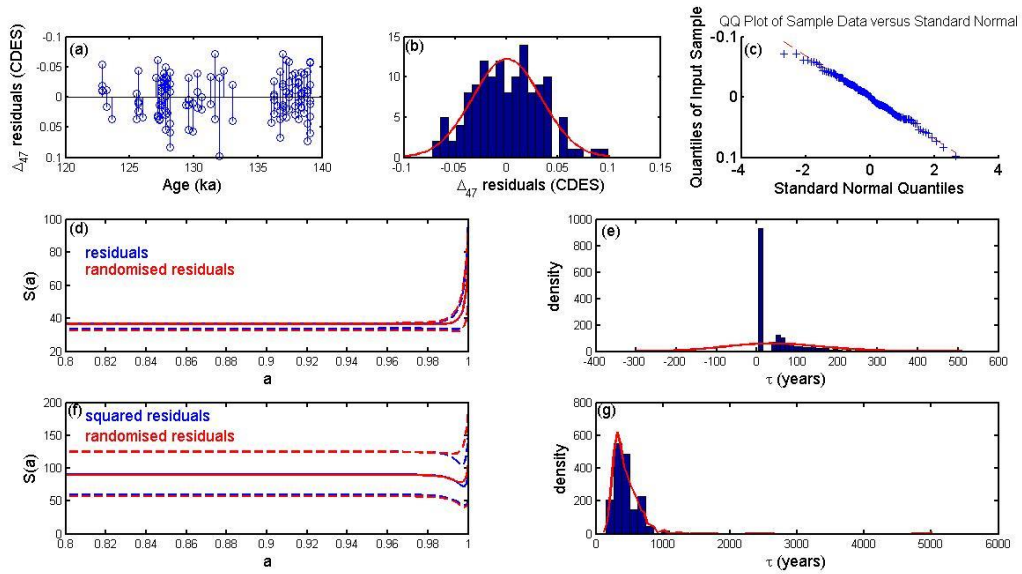

286

287 **Supplementary Figure 11. Residuals analysis for the  $\Delta_{47}$ - record from ODP967.** In the  
 288 upper panels (**a-c**) we check that residuals are normally distributed, in the middle panels (**d-e**)  
 289 we check that residuals are not auto-correlated (persistence time  $\tau < 1,000$  year), and in the lower  
 290 panels (**f-g**) we check residuals for conditional heteroscedasticity. **a**, stem plot of the residuals  
 291 between the measured  $\Delta_{47}$ -replicates and the 50<sup>th</sup> percentile of the  $\Delta_{47}$  MGW filtered Monte  
 292 Carlo realizations. **b**, histogram of the residuals. **c**, Quantile-quantile plot of the residuals. **d**,  
 293 variation of  $S(a)$  - the least-squares estimator that minimizes  $a$  ( $a = \exp(-1/\tau)$ )- when  $a$  varies  
 294 from 0.8 to 1 and we use the residuals (blue) or the randomised residuals (red). **e**, kernel density  
 295 estimate of  $\tau$ . **f-g** are like **d-e**, respectively, but using the squared-residuals.

296

297 **Supplementary Table 1. Insolation-induced extra warming in the summer mixed layer**  
 298 **during the onset of S5 with respect to late-Holocene.** Summer mixed layer value at present is  
 299 ~50m and it is expected to shoal during sapropel periods<sup>15</sup>. Insolation was obtained from ref. <sup>16</sup>  
 300 using AnalySeries software. We averaged summer (June 21<sup>st</sup>) and winter insolation (December  
 301 21<sup>st</sup>) at 34°N during the late-Holocene (0-2 ka) and onset of the S5 (127-129 ka). We calculated  
 302 the resultant mixed layer heating for three scenarios: a) using late-Holocene insolation and  
 303 present mixed layer; b) onset of S5 insolation and present mixed layer; c) onset of S5 insolation  
 304 and shallower mixed layer (35 m). Attenuation (a) in all cases was varied between 0.4-0.6 (20 %  
 305 of that in Athens).

|             | Insolation<br>(W/m <sup>2</sup> ) | variability<br>(W/m <sup>2</sup> ) | mixed<br>layer (m) | Surface water heating (°C) |       |       | S5-Holocene gradient (°C) |       |        |
|-------------|-----------------------------------|------------------------------------|--------------------|----------------------------|-------|-------|---------------------------|-------|--------|
|             |                                   |                                    |                    | a=0.4                      | a=0.5 | a=0.6 | a=0.4                     | a=0.5 | a =0.6 |
| a) Holocene | 340                               | 150                                | 50                 | 15.8                       | 12.7  | 9.5   | -                         | -     | -      |
| b) S5 onset | 358                               | 180                                | 50                 | 17.5                       | 14.0  | 10.5  | 1.7                       | 1.3   | 1.0    |
| c) S5 onset | 358                               | 180                                | 35                 | 25.0                       | 20.0  | 15.0  | 9.2                       | 7.3   | 5.5    |

306  
 307 **Supplementary Table 2. Tie points for the ODP967 age model based on the radiometrically**  
 308 **constrained chronology<sup>7</sup> for LC21**

| ODP967 depth (m) | Age (ka) synchronized to LC21 | ±1σ error age | tie point from         |
|------------------|-------------------------------|---------------|------------------------|
| 5.50             | 107.80                        | 0.54          | XRF                    |
| 7.50             | 121.50                        | 1.71          | XRF                    |
| 7.61             | 125.48                        | 1.36          | δ <sup>18</sup> O bulk |
| 7.80             | 128.30                        | 1.08          | XRF                    |
| 8.02             | 135.69                        | 0.79          | δ <sup>18</sup> O bulk |
| 9.72             | 175.63                        | 1.00          | XRF                    |

309  
 310 **Supplementary Table 3. Carbonate standards values for data processing**

|       | δ <sup>13</sup> C (‰, VPDB) | δ <sup>18</sup> O (‰, VPDB) | Δ <sub>47</sub> (‰, CDES) |
|-------|-----------------------------|-----------------------------|---------------------------|
| ETH-1 | 2.0                         | -2.17                       | 0.265                     |
| ETH-2 | -10.2                       | -18.59                      | 0.267                     |
| ETH-3 | 1.67                        | -1.76                       | 0.703                     |
| ETH-4 | -10.22                      | -18.66                      | 0.522                     |

311  
 20
